# Supplementary material for: A rapid in situ electrochemical transformation of the biphase Zn3(OH)2V2O7·2H2O/NH4V4O10 composite for high capacity and long cycling life aqueous rechargeable zinc ion batteries
Source: Royal Society of Chemistry journal article supplement (doi:10.1039/d1ce01368h), 2022-01-01
Supplement: d1ce01368h1.pdf [file d1ce01368h1.pdf]

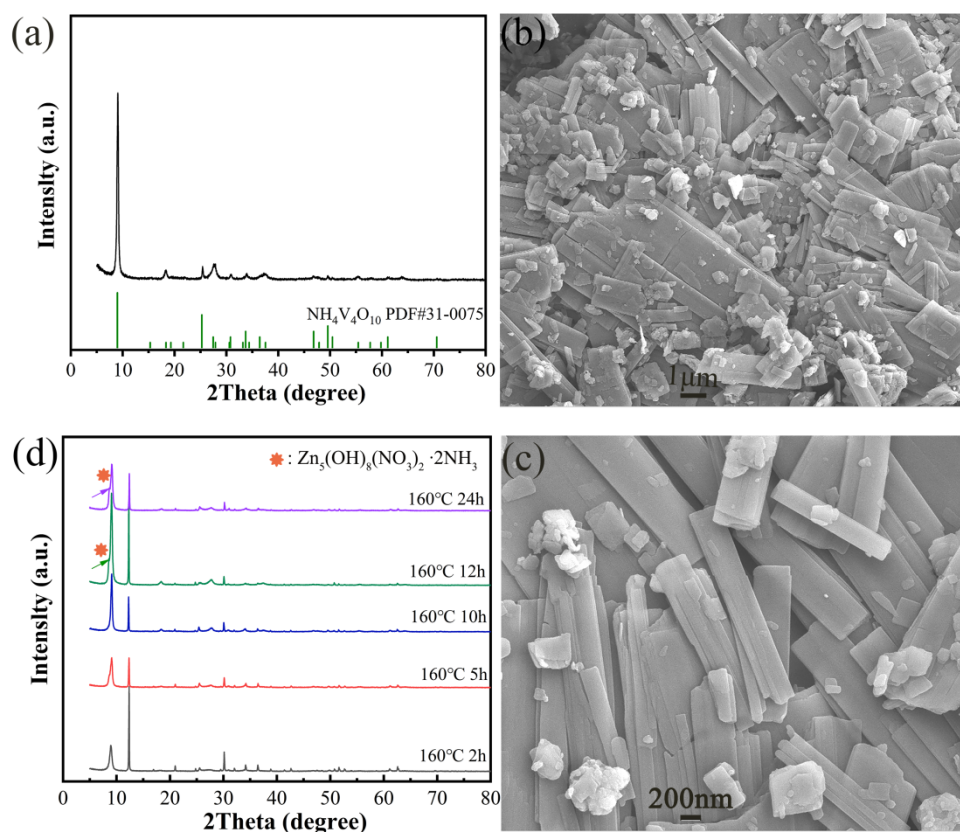

Fig.S1. XRD pattern (a) and SEM images (b-c) of NVO nanobelts without adding zinc source, (d) the XRD patterns of the ZnVO/NVO prepared by different reaction times.

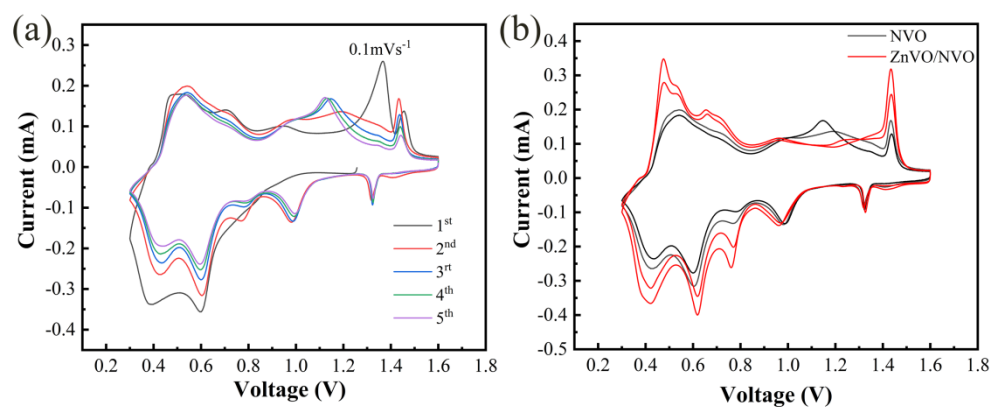

Fig. S2. The first five CV curves of NVO sample (a), the second and third CV curves (b) of the ZnVO/NVO and NVO samples at the scan rate of 0.1 mV s<sup>-1</sup>.

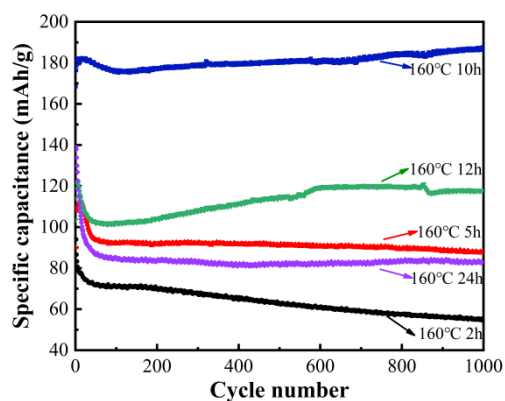

Fig. S3. The corresponding long-term cycling performance at the current density of  $10.0 \text{ A g}^{-1}$  of the ZnVO/NVO prepared by different reaction times.

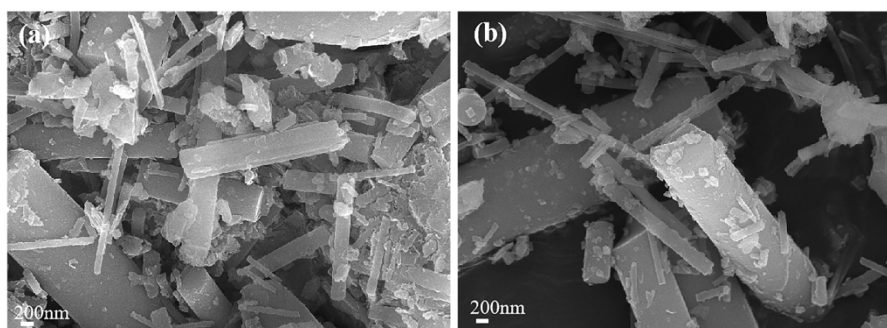

Fig. S4. The SEM images of the ZnVO/NVO electrodes after the 5 (a) and 1000 (b) cycles.

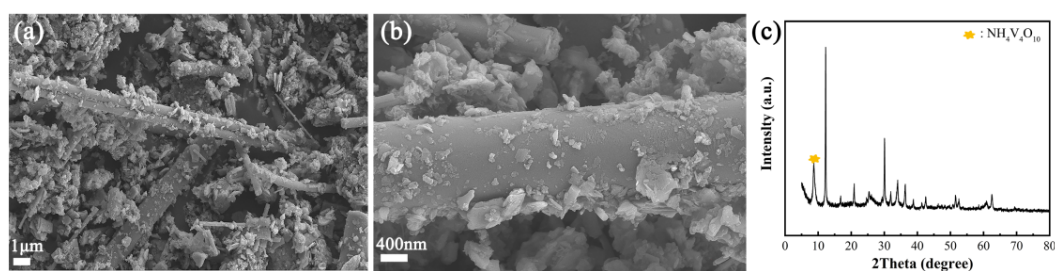

Fig. S5. The SEM images (a-b) and XRD pattern (c) of the NVO electrode after the 5 cycles.

Table S1. Comparison of electrochemical properties of ZnVO/NVO with previously reported V-based cathode materials.

| Materials | High discharge capacity | Capacity retention |
|-----------|-------------------------|--------------------|
|           |                         |                    |

|                                                                                                                              |                                                                                     |                                                  |
|------------------------------------------------------------------------------------------------------------------------------|-------------------------------------------------------------------------------------|--------------------------------------------------|
| $\text{Zn}_3(\text{OH})_2\text{V}_2\text{O}_7 \cdot 2\text{H}_2\text{O} / \text{NH}_4\text{V}_4\text{O}_{10}$<br>(this work) | 329 and 187 mAh g <sup>-1</sup> at 5 and 10.0 A g <sup>-1</sup> , respectively      | 94% after 2000 cycles at 10.0 A g <sup>-1</sup>  |
| $(\text{NH}_4)_2\text{V}_6\text{O}_{16} \cdot 1.5\text{H}_2\text{O}$ [1]                                                     | 284.6 and 172 mAh g <sup>-1</sup> at 3.0 and 5.0 A g <sup>-1</sup> , respectively   | 100% after 3000 cycles at 5.0 A g <sup>-1</sup>  |
| $(\text{NH}_4)_x\text{V}_2\text{O}_5 \cdot n\text{H}_2\text{O}$ [2]                                                          | 372 and 219 mAh g <sup>-1</sup> at 0.1 and 5.0 A g <sup>-1</sup> , respectively     | 80% after 2000 cycles at 5.0 A g <sup>-1</sup>   |
| $(\text{NH}_4)_2\text{V}_4\text{O}_9 \cdot 0.5\text{H}_2\text{O}$ [3]                                                        | 200 and 177 mAh g <sup>-1</sup> at 0.5 and 5.0 A g <sup>-1</sup> , respectively     | 93% after 1000 cycles at 1.0 A g <sup>-1</sup>   |
| $(\text{NH}_4)_{0.58}\text{V}_2\text{O}_5 \cdot 0.98\text{H}_2\text{O}$ [4]                                                  | 391 and 258 mAh g <sup>-1</sup> at 0.5 and 2.0 A g <sup>-1</sup> , respectively     | 53% after 400 cycles at 2.0 A g <sup>-1</sup>    |
| $\text{NH}_4\text{V}_4\text{O}_{10} \cdot 0.28\text{H}_2\text{O}$ [5]                                                        | 385 and 319 mAh g <sup>-1</sup> at 0.5 and 2.0 A g <sup>-1</sup> , respectively     | 76% after 500 cycles at 2.0 A g <sup>-1</sup>    |
| $(\text{NH}_4)_2\text{V}_6\text{O}_{16}$ [6]                                                                                 | 323.5 and 238.7 mAh g <sup>-1</sup> at 0.1 and 5.0 A g <sup>-1</sup> , respectively | 78.3% after 2000 cycles at 5.0 A g <sup>-1</sup> |
| $(\text{NH}_4)_{0.37}\text{V}_2\text{O}_5 \cdot 0.15\text{H}_2\text{O}$ [7]                                                  | 398 and 168 mAh g <sup>-1</sup> at 0.5 and 10.0 A g <sup>-1</sup> , respectively    | 84% after 1000 cycles at 10.0 A g <sup>-1</sup>  |
| $\text{Zn}_3\text{V}_2\text{O}_7(\text{OH})_2 \cdot 2\text{H}_2\text{O}$ [8]                                                 | 150 and 76 mAh g <sup>-1</sup> at 0.2 and 3.0 A g <sup>-1</sup> , respectively      | 68% after 300 cycles at 0.2 A g <sup>-1</sup>    |

## Reference:

- [1] X. Wang, B. Xi, Z. Feng, W. Chen, H. Li, Y. Jia, J. Feng, Y. Qian, S. Xiong, *J. Mater. Chem. A*, 2019, **7**, 19130–19139.
- [2] L. Xu, Y. Zhang, J. Zheng, H. Jiang, T. Hu, C. Meng, *Mater. Today Energy*, 2020, **18**, 100509.
- [3] R. Wei, X. Wang, B. Xi, Z. Feng, H. Li, W. Chen, Y. Jia, J. Feng, S. Xiong, *ACS Appl. Energy Mater.*, 2020, **3**, 5343–5352.
- [4] H. Zhao, Q. Fu, D. Yang, A. Sarapulova, Q. Pang, Y. Meng, L. Wei, H. Ehrenberg, Y. Wei, C. Wang, G. Chen, *ACS Nano*, 2020, **14**, 11809–11820.
- [5] T. Zhu, B. Mai, P. Hu, Z. Liu, C. Cai, X. Wang, L. Zhou, *Chin. J. Chem.*, 2021, **39** 1885–1890.
- [6] L. Xu, Y. Zhang, H. Jiang, J. Zheng, X. Dong, T. Hu, C. Meng, *Colloids Surf. A: Physicochem. Eng. Aspects*, 2020, **593**, 124621.
- [7] M. Tamilselvan, T.V.M. Sreekanth, K. Yoo, J. Kim, *J. Ind. Eng. Chem.*, 2021, **93**, 176–185.
- [8] C. Xia, J. Guo, Y. Lei, H. Liang, C. Zhao, H.N. Alshareef, *Adv. Mater.*, 2018, **30**, 1705580.
